# Supplementary material
Source: PubMed Central journal article supplement (PMC2775823)
Supplement: mmc1.pdf [file mmc1.pdf]

Supplemental Data

AJHG, Volume 85

## Common Variants in the Trichohyalin Gene

### Are Associated with Straight Hair in Europeans

Sarah E. Medland, Dale R. Nyholt, Jodie N. Painter, Brian P. McEvoy, Allan F. McRae, Gu Zhu, Scott D. Gordon, Manuel A.R. Ferreira, Margaret J. Wright, Anjali K. Henders, Megan J. Campbell, David L. Duffy, Narelle K. Hansell, Stuart Macgregor, Wendy S. Slutske, Andrew C. Heath, Grant W. Montgomery, and Nicholas G. Martin

Figure S1: Flowchart Showing the Overlap of Participants between Genotyping Projects.

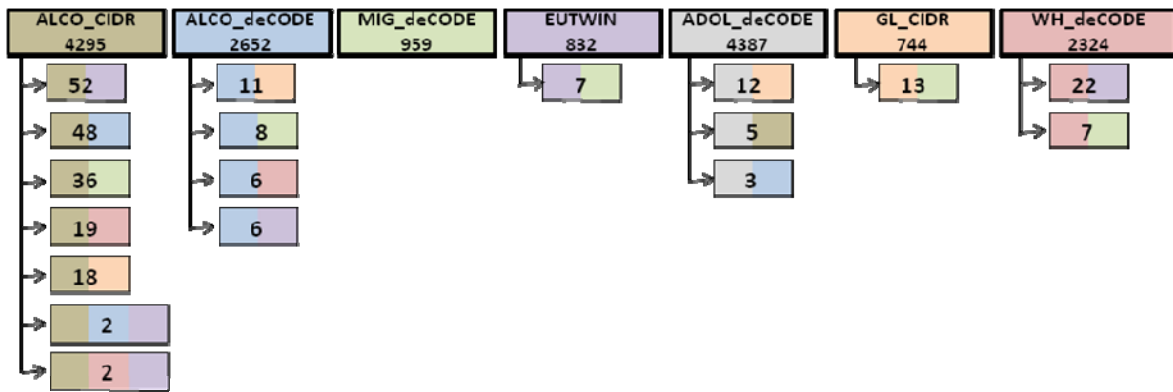

Colour codes are used to indicate the projects; the numbers in the title boxes indicated the number of non-duplicate individuals in each genotyping project; the underlying boxes demonstrate the number of individuals typed in multiple projects, which the colour coding indicating the sources of the genotyping. Following the QC of the individual projects the data from the seven waves of genotyping were integrated. A number of samples were duplicated between the various genotyping projects to allow for cross project QC. After integration of the data sets the data were screened for missingness within individuals (>5% taking into account the number of SNPs that were genotyped for each individual), pedigree and sex errors, and Mendelian errors (genotypes for all family members for a given SNP were removed on detection of errors). Following QC, in cases where one individual from a monozygotic twin pair had been genotyped, duplicate genotypes were assigned to the ungenotyped co-twin, this resulted in a final sample size of 16,507 individuals.

Figure S2: Principal Component Analysis of Australians and 16 Global Populations

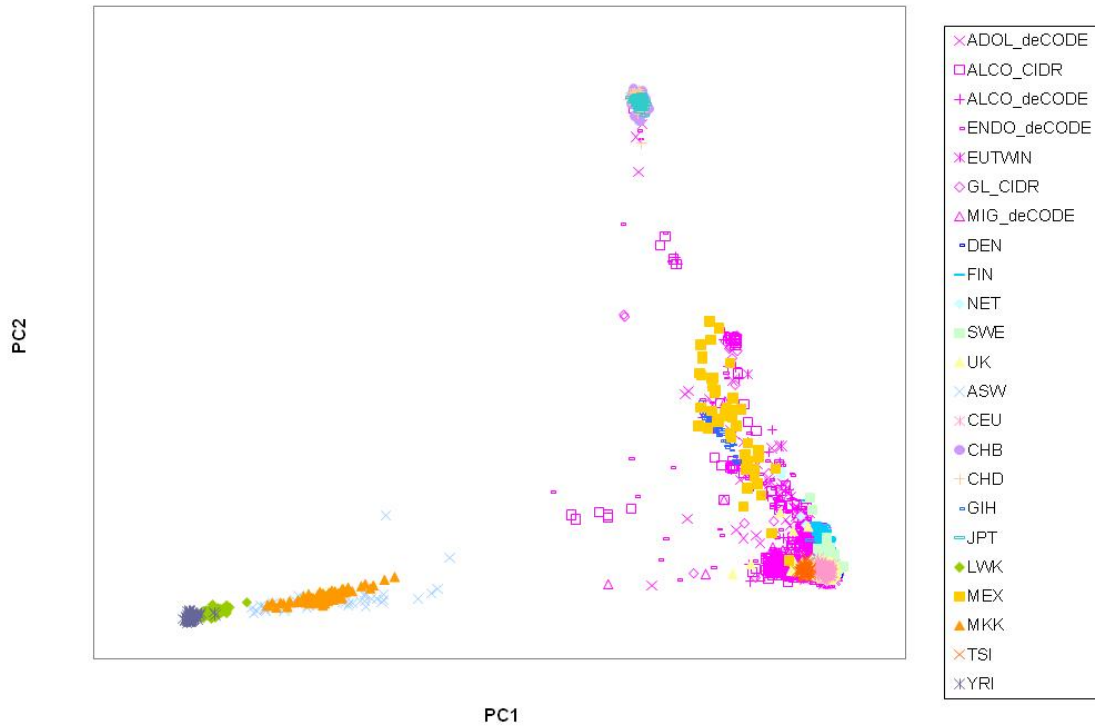

The PC1 and PC2 values for each individual are plotted against each other. Abbreviations are listed in Supplementary Tables 1 and 3. PCA was conducted using the autosomal SNPs that were genotyped in common between all Australian cohorts, HM3 and GEUT populations with the further proviso that SNP missing rates were < 2.5% in all individual cohorts and populations. A total of 225,455 SNPs fulfilled these requirements. The EIGENSOFT package was used to conduct the PCA<sup>2</sup>. Only those individuals in the 16 populations (n = 2317) were included in the initial PCA used to generate the top10 Eigenvectors or Principal components (PCs). The Australian data was then projected onto this 'genetic space' background. PC1 largely reflects the difference between Africans and non-Africans while PC2 separates East Asians from others. Further PCs show substantially lower values than those associated with PC1 and PC2. The Australian individuals cluster with Europeans as expected. However, several show evidence of African or Asian ancestry. We used the non-Australian European populations (CEU, TSI, NET, UK, SWE, FIN and DEN) to calculate mean reference PC1 and PC2 scores. Any Australian individual more than 6 standard deviations from this mean was deemed to be an ancestry outlier. Any full siblings of offspring of excluded individuals were also excluded. A total of 277 Australian individuals were excluded as outliers (1.8% of the original sample) and an additional 70 individuals were excluded as relatives of an excluded individual.

Figure S3: QQ-Plots of the Mx Results from the a) Adolescent sample ( $\lambda=0.98$ ), b) Adult S1 sample ( $\lambda=1.022$ ), c) Adult S2 sample ( $\lambda=1.021$ ), and d) the meta-analysis of the 3 sets of Mx results. Note triangles are used in panel d to indicate truncated data points.

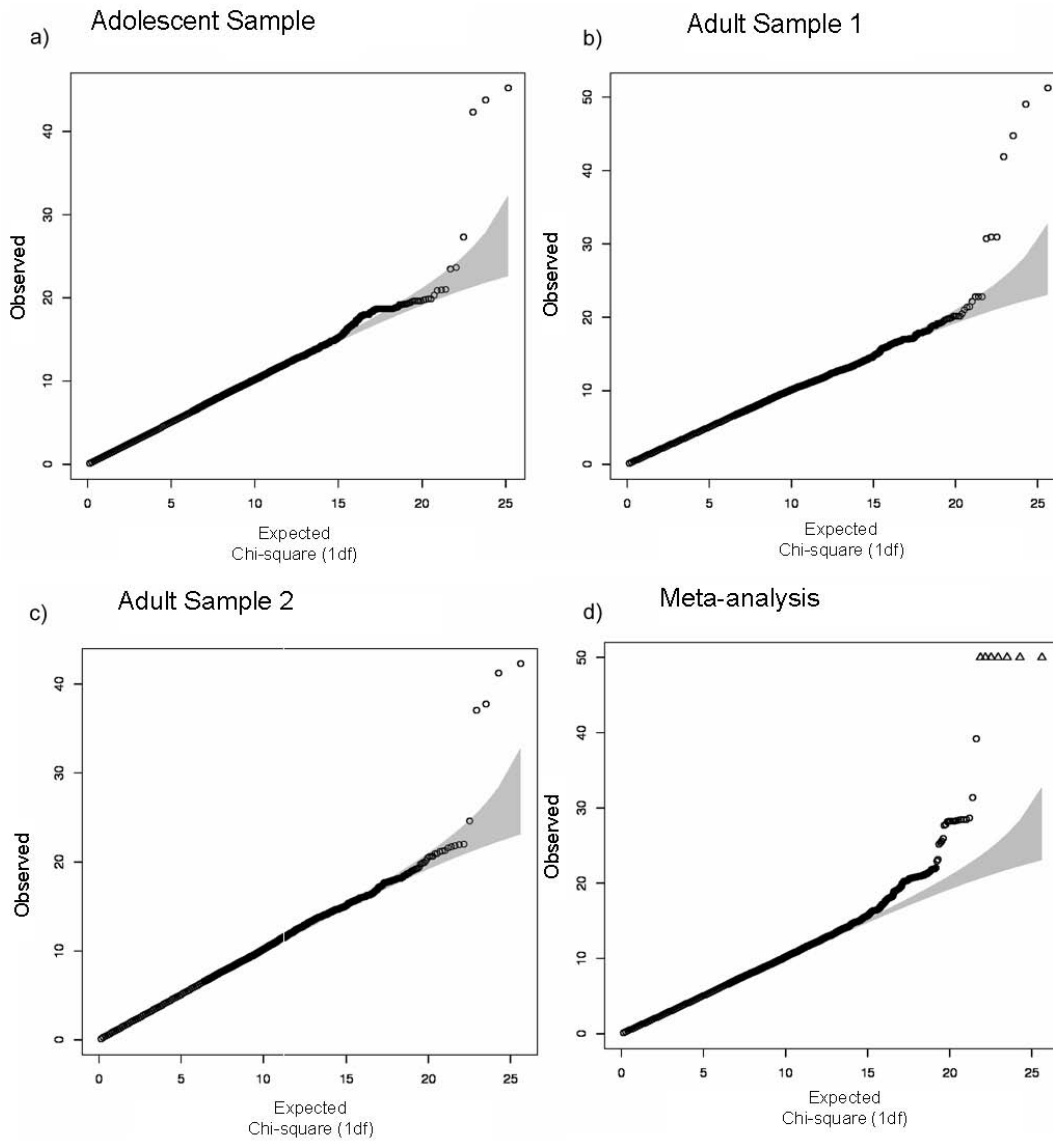

Figure S4: Panel 1, Mx results from the Adolescent sample; Panel 2, Mx results from the Adult S1 sample; Panel 3, Mx results from the Adult S2 sample; Panel 4, Results from the Metal N weighted meta-analysis of the 3 samples; Panel 5, Results from the Metal N weighted meta-analysis presented in Panel 4 – note the Y axis is truncated

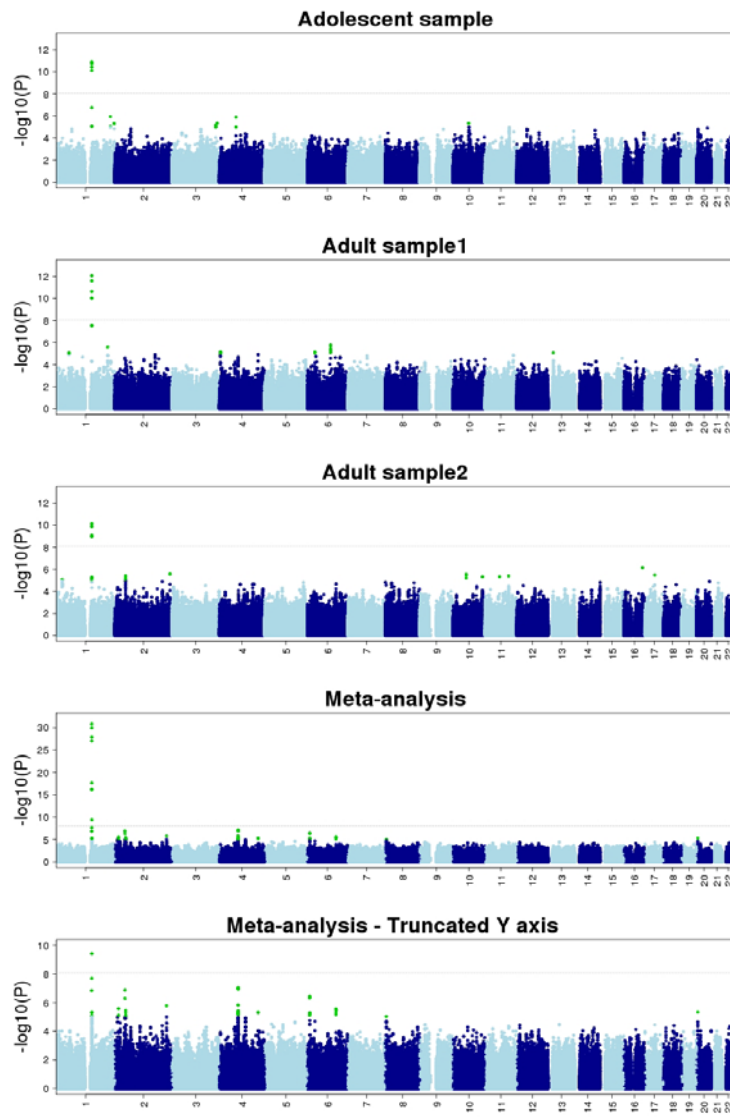

Figure S5: Panel 1, Results of the Meta-analysis for the three family samples; Panel 2, In addition, we carried out case-control analyses to facilitate further epistatic and conditional analyses. These analyses were conducted using the data from one individual from each family. The phenotypic data were re-coded as straight vs non-straight, and participants were preferentially selected for non-straight hair in order to maximise power. This resulted in a sample of 1289 wavy/curly cases (588 Male) and 1582 straight haired controls (994 Male). Results of the Plink logistic regression analyses of the case-control sub-sample correcting for age and sex; Panel 3, Results of the Plink logistic regression analyses of the case-control sub-sample correcting for age, sex and rs11803731 genotype; Panel 3, Results of the Plink epistasis analyses (in which evidence of interaction with rs11803731 is considered for each SNP in turn across the genome) of the case-control sub-sample

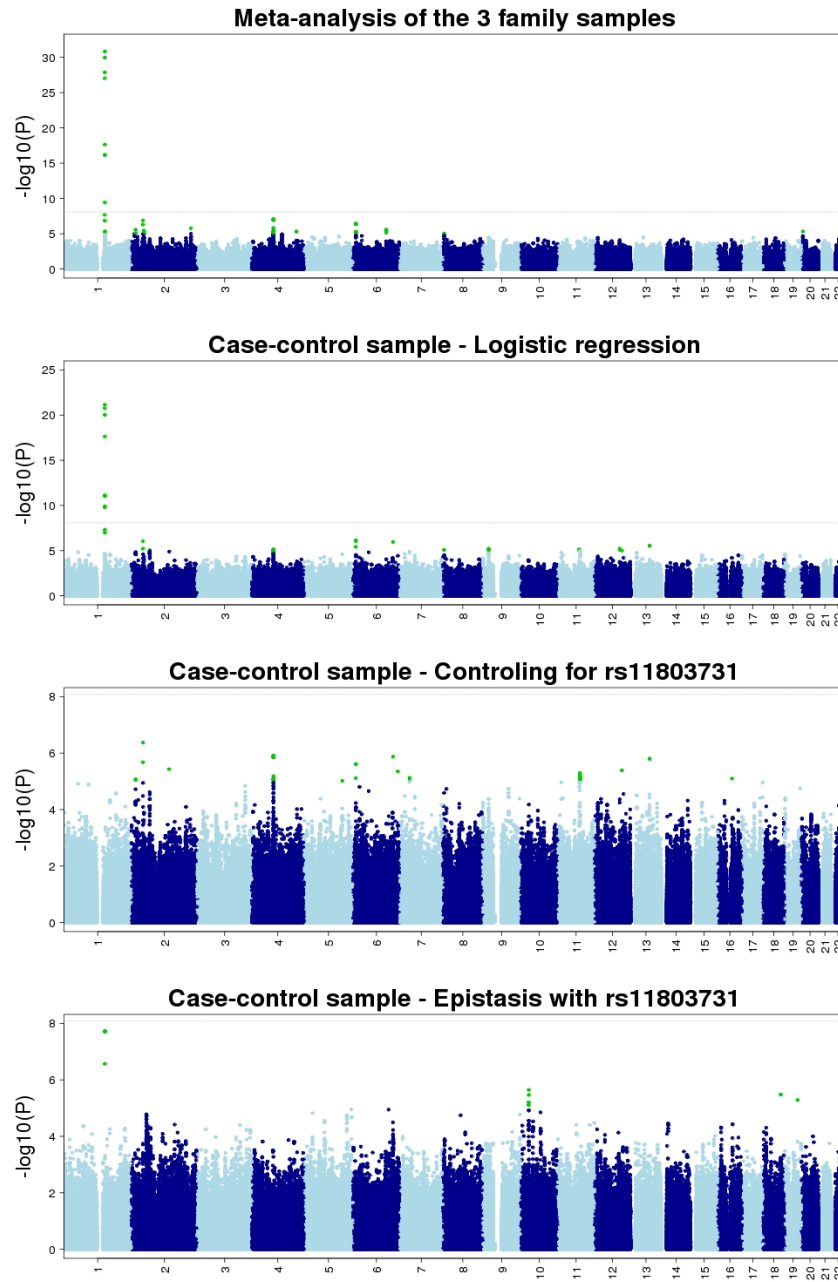

Figure S6: Panel 1, Results of the Plink logistic regression analyses of the case-control sub-sample in Males correcting for age; Panel 2, Results of the Plink logistic regression analyses of the case-control sub-sample in Females correcting for age; Panel 3, Results of the Plink heterogeneity of odds ratios analyses of the case-control sub-sample testing for differences in odds ratios between the sexes. As expected, given the magnitude of the association signal, there was no evidence of sex differences in the 1q21.3 region. The strongest evidence of heterogeneity was observed at rs10817168 ( $P = 4.8 \times 10^{-7}$ ) on Chromosome 9 (113,114,526 bp).

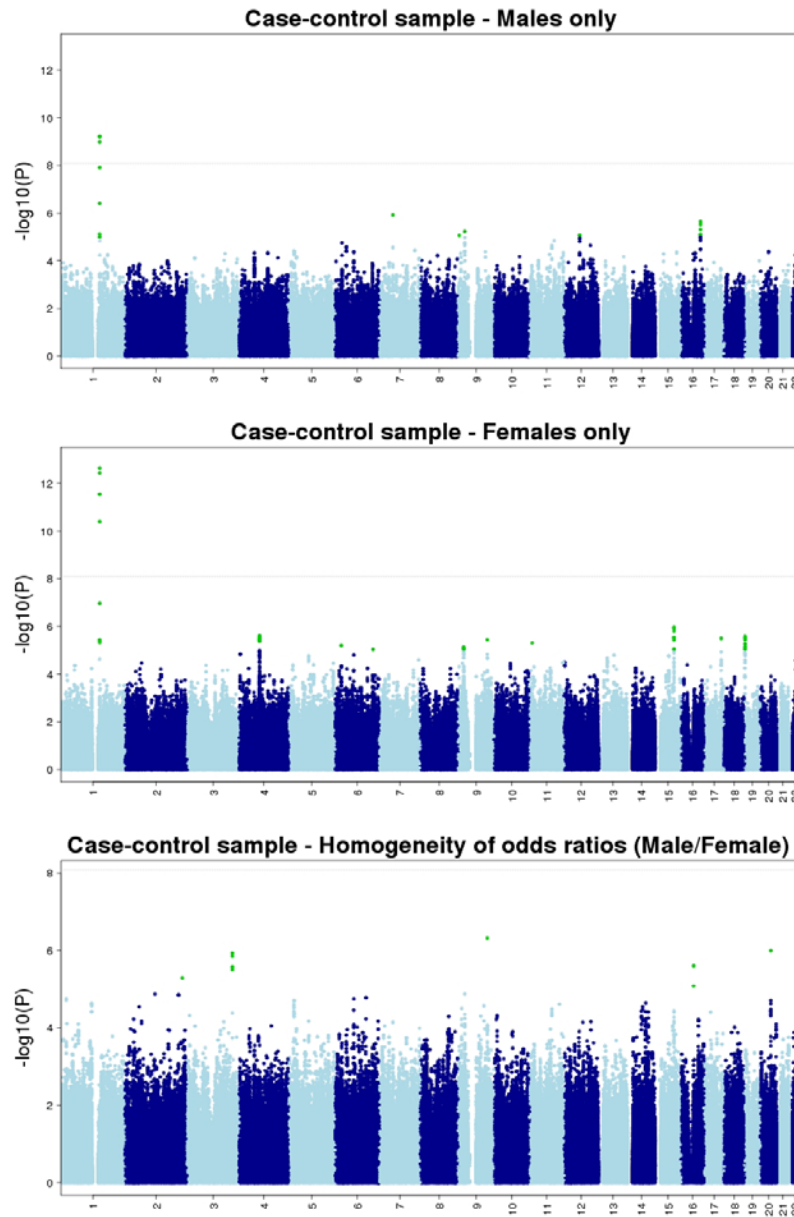

Figure S7: Extended Haplotype Homozygosity Patterns within the 1q21.3 Region in the HGDP Cohort

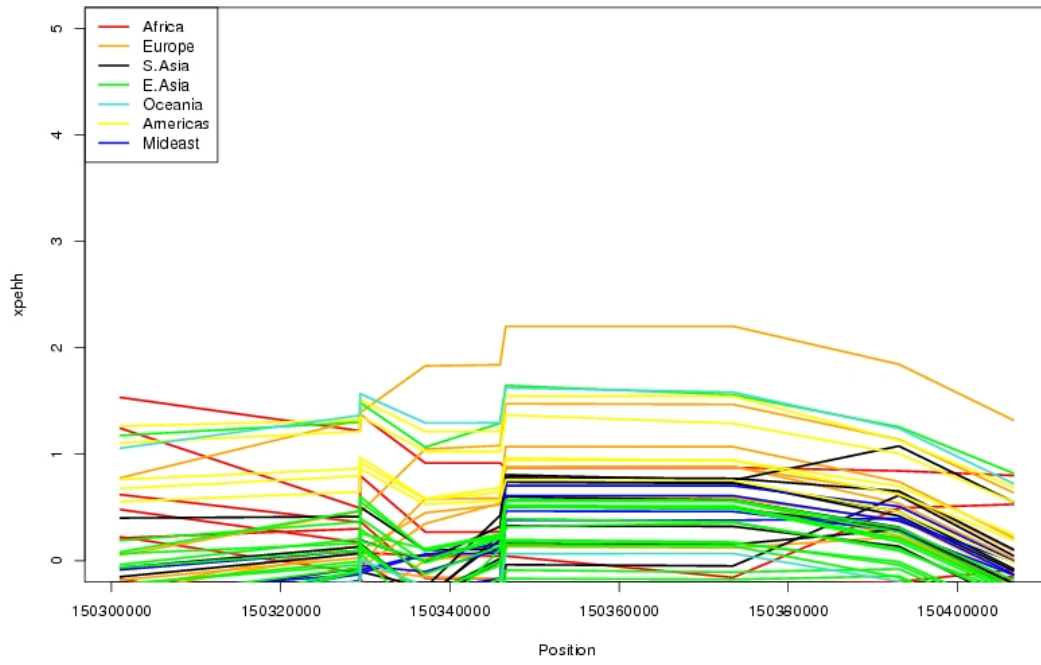

Figure S8. Dot plot comparisons of TCHH proteins illustrating regions containing repetitive amino acid (aa) motifs in a) Human (*Homo sapiens*; NP\_009044.2), b) Sheep (*Ovis aries*; CAA79165.1), c) Rabbit (*Oryctolagus cuniculus*; CAA79165.1) and d) Mouse (*Mus musculus*; NP\_001156570.1). Only species for which the aa sequences are known rather than predicted are shown. The position of the p.Leu790Met change caused by rs11803731, between the first and second repetitive aa regions in humans, is indicated by a dot on the human plot.

a)

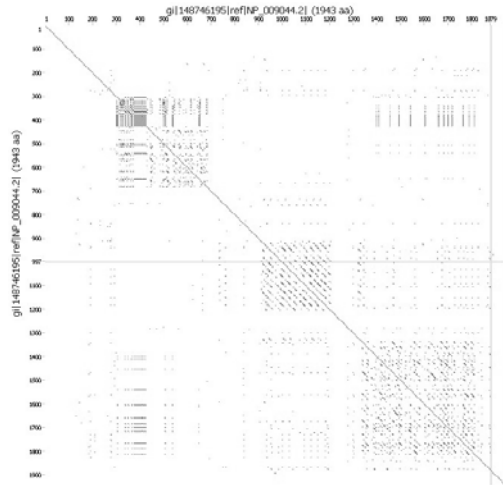

b)

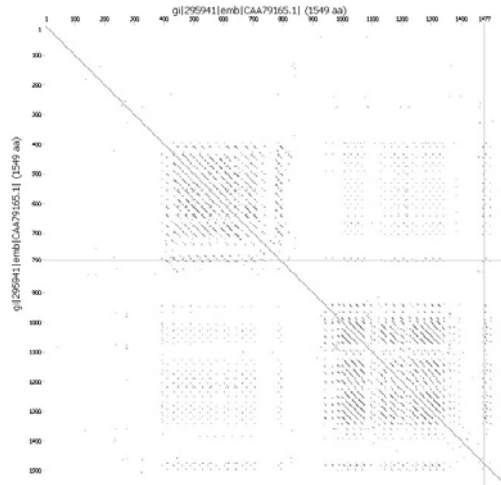

c)

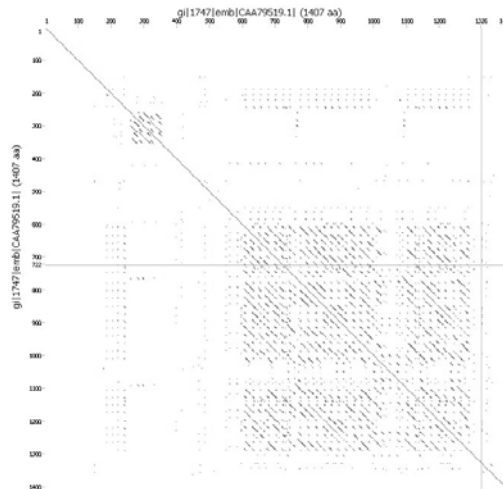

d)

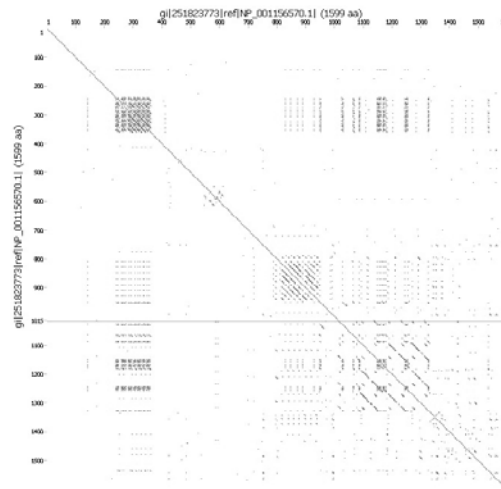



Figure S9: Minor Allele Frequency for the *EDAR* SNP rs3827760 Based on the Human Genome Diversity Project <sup>5</sup>

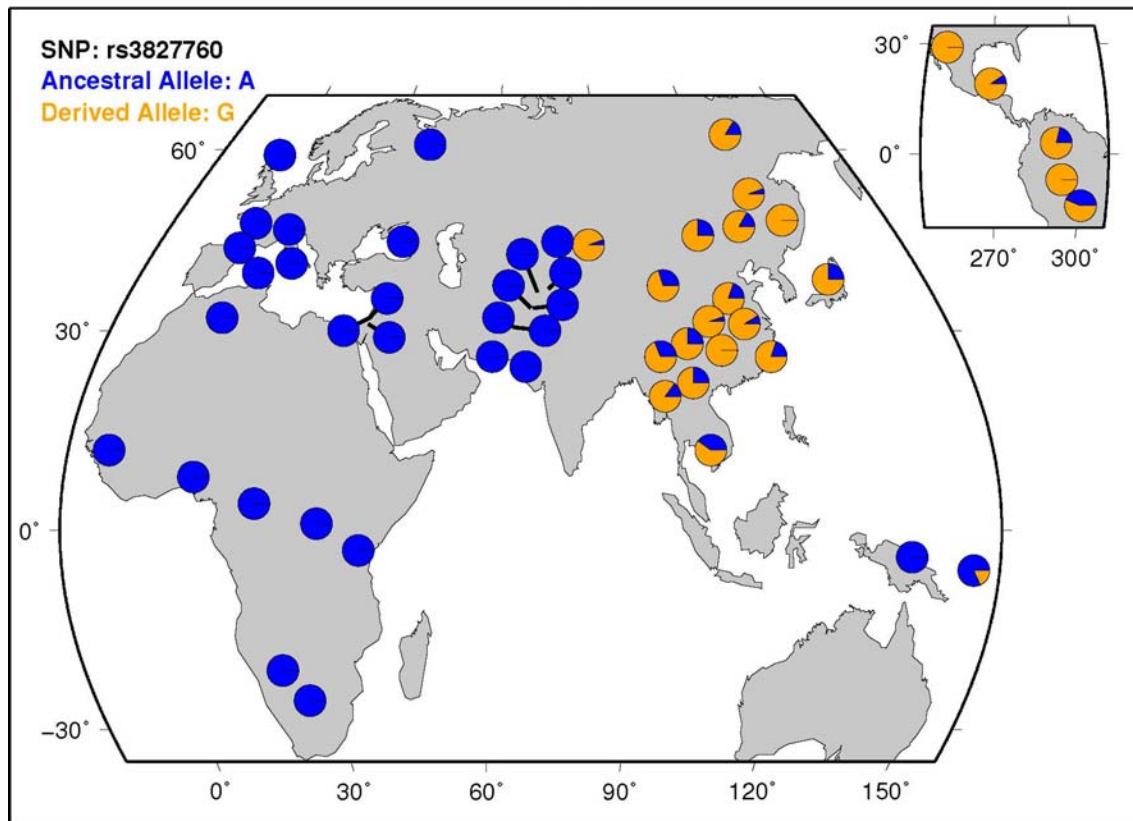

Table S1: Comparative Populations Used in the EIGENSOFT Principal Component Analysis

| Abbreviation | Population                                                                          | n   | Source       |
|--------------|-------------------------------------------------------------------------------------|-----|--------------|
| ASW          | African ancestry in Southwest USA                                                   | 49  | Hapmap3      |
| CEU          | Utah residents with Northern and Western European ancestry from the CEPH collection | 112 | Hapmap3      |
| CHB          | Han Chinese in Beijing, China                                                       | 84  | Hapmap3      |
| CHD          | Chinese in Metropolitan Denver, Colorado                                            | 85  | Hapmap3      |
| GIH          | Gujarati Indians in Houston, Texas                                                  | 88  | Hapmap3      |
| JPT          | Japanese in Tokyo, Japan                                                            | 86  | Hapmap3      |
| LWK          | Luhya in Webuye, Kenya                                                              | 90  | Hapmap3      |
| MEX          | Mexican ancestry in Los Angeles, California                                         | 50  | Hapmap3      |
| MKK          | Maasai in Kinyawa, Kenya                                                            | 143 | Hapmap3      |
| TSI          | Toscans in Italia                                                                   | 88  | Hapmap3      |
| YRI          | Yoruba in Ibadan, Nigeria                                                           | 113 | Hapmap3      |
| UK           | United Kingdom                                                                      | 433 | GenomeEUtwin |
| NET          | Netherlands                                                                         | 284 | GenomeEUtwin |
| DEN          | Denmark                                                                             | 161 | GenomeEUtwin |
| SWE          | Sweden                                                                              | 302 | GenomeEUtwin |
| FIN          | Finland                                                                             | 149 | GenomeEUtwin |

In order to identify gross ancestry outliers we used Principal Component Analysis (PCA) of similarly genotyped data from 16 global populations sourced from Hapmap Phase 3 [HM3] (11 populations) and a previously published study of Northern European genetic diversity (GEUT - 5 populations)<sup>1</sup>. Details of the comparative populations used are given in Table S5. PCA was conducted using the autosomal SNPs that were genotyped in common between all Australian cohorts, HM3 and GEUT populations with the further proviso that SNP missing rates were < 2.5% in all individual cohorts and populations. A total of 225,455 SNPs fulfilled these requirements.

Table S2: Summary of the 18 CNVs Detected in the TCHH Region

| ID  | Start B.P. (SNP)        | Stop B.P. (SNP)         | Length<br>(No. SNP) | Copy<br>Number | log Bayes<br>Factor |
|-----|-------------------------|-------------------------|---------------------|----------------|---------------------|
| 1   | 150345938 (rs9050)      | 150349857 (rs2496257)   | 3919 (4)            | 1              | 1.68                |
| 2   | 150373477 (rs11588437)  | 150531734 (cnvi0009402) | 158257 (40)         | 1              | 2.95                |
| 3   | 150102061 (rs6587626)   | 150248644 (rs2932574)   | 146583 (21)         | 1              | 3.34                |
| 4   | 150345938 (rs9050)      | 150373477 (rs11588437)  | 27539 (5)           | 1              | 1.23                |
| 5   | 150345938 (rs9050)      | 150373477 (rs11588437)  | 27539 (5)           | 1              | 6.35                |
| 6   | 150317309 (cnvi0009354) | 150432502 (rs1552991)   | 115193 (24)         | 1              | 1.25                |
| 7   | 150345938 (rs9050)      | 150373477 (rs11588437)  | 27539 (5)           | 0              | 4.97                |
| 7   | 150406640 (rs1496036)   | 150432502 (rs1552991)   | 25862 (13)          | 3              | 2.19                |
| 8   | 150345938 (rs9050)      | 150373477 (rs11588437)  | 27539 (5)           | 1              | 0.88                |
| 9   | 150233369 (rs1038745)   | 150610517 (rs11204988)  | 377148 (71)         | 1              | 2.44                |
| 10  | 150345938 (rs9050)      | 150373477 (rs11588437)  | 27539 (5)           | 0              | 4.35                |
| 10  | 150406640 (rs1496036)   | 150432502 (rs1552991)   | 25862 (13)          | 3              | -1.85               |
| 11  | 150317309 (cnvi0009354) | 150373477 (rs11588437)  | 56168 (11)          | 1              | 6.02                |
| 11  | 150406640 (rs1496036)   | 150432502 (rs1552991)   | 25862 (13)          | 3              | -0.04               |
| 12  | 150345938 (rs9050)      | 150349857 (rs2496257)   | 3919 (4)            | 1              | 3.4                 |
| 13  | 150348488 (rs2496252)   | 150349857 (rs2496257)   | 1369 (2)            | 1              | 1.37                |
| 14  | 150317309 (cnvi0009354) | 150349857 (rs2496257)   | 32548 (10)          | 1              | 5.98                |
| 15  | 150406640 (rs1496036)   | 150422946 (rs12079949)  | 16306 (6)           | 1              | 2.74                |
| 16* | 150233369 (rs1038745)   | 150373477 (rs11588437)  | 140108 (22)         | 1              | 7.92                |
| 17* | 150233369 (rs1038745)   | 150373477 (rs11588437)  | 140108 (22)         | 1              | 1.41                |

\* Individuals 16 and 17 are siblings

CNV status of the TCHH region was investigated in the ADOL\_deCODE sample using the program QuantiSNP<sup>3</sup> on the Illumina 610K arrays. The default program settings were used with the addition of setting the maximum copy number to four and enabling the GC correction. In total, 18 individuals showed some evidence for copy number variation in the region flanked by SNPs rs1038745 and rs924088. Three samples contained two copy number variants, each with one copy number gain and one copy number loss. No further copy number gains were observed across all samples. However, this does not exclude copy number variants that are smaller than the detection capability of this array being important in the underlying biological mechanism.

Table S3: SNPs with a Combined p Value of Less Than  $p < 1 \times 10^{-5}$  for the Meta-Analysis.

| SNP        | CHR | BP        | Effect Allele | Non Effect Allele | P value   | Closest gene | SNP Type                                |
|------------|-----|-----------|---------------|-------------------|-----------|--------------|-----------------------------------------|
| rs17646946 | 1   | 152062767 | a             | g                 | 1.500e-31 | TCHH         | UPSTREAM<br>NON SYNONYMOUS<br>CODING    |
| rs11803731 | 1   | 152083325 | a             | t                 | 3.184e-31 | TCHH         | UPSTREAM<br>NON SYNONYMOUS<br>CODING    |
| rs4845418  | 1   | 152136230 | c             | g                 | 4.429e-29 | AL135842.2   | UPSTREAM                                |
| rs12130862 | 1   | 152027015 | a             | t                 | 3.118e-28 | AL591893.2   | INTERGENIC<br>WITHIN NON CODING<br>GENE |
| rs12123975 | 1   | 152004804 | a             | g                 | 1.143e-18 | AL591893.3   | WITHIN NON CODING<br>GENE               |
| rs2999547  | 1   | 152002663 | a             | c                 | 3.43e-17  | AL591893.3   | WITHIN NON CODING<br>GENE               |
| rs3007671  | 1   | 151999347 | t             | g                 | 3.456e-17 | AL591893.3   | WITHIN NON CODING<br>GENE               |
| rs1858483  | 1   | 152310086 | t             | c                 | 2.632e-10 | AL135842.2   | WITHIN NON CODING<br>GENE               |
| rs10788819 | 1   | 151895093 | t             | c                 | 1.556e-08 | AL450992.4   | INTERGENIC                              |
| rs1268789  | 4   | 79499717  | t             | c                 | 6.58e-08  | FRAS1        | INTRONIC                                |
| rs375726   | 4   | 79500774  | t             | c                 | 7.381e-08 | FRAS1        | INTRONIC                                |
| rs431907   | 4   | 79500052  | a             | g                 | 7.401e-08 | FRAS1        | INTRONIC                                |
| rs447200   | 4   | 79499112  | t             | c                 | 7.474e-08 | FRAS1        | INTRONIC                                |
| rs120233   | 4   | 79501372  | a             | g                 | 7.618e-08 | FRAS1        | INTRONIC                                |
| rs22078    | 4   | 79501556  | c             | g                 | 7.859e-08 | FRAS1        | INTRONIC                                |
| rs1385131  | 4   | 79501783  | a             | g                 | 8.119e-08 | FRAS1        | INTRONIC                                |
| rs345545   | 4   | 79502667  | t             | g                 | 8.228e-08 | FRAS1        | INTRONIC                                |
| rs345544   | 4   | 79502735  | a             | t                 | 8.284e-08 | FRAS1        | INTRONIC                                |
| rs529184   | 4   | 79502427  | t             | c                 | 8.391e-08 | FRAS1        | INTRONIC                                |
| rs345546   | 4   | 79502619  | a             | g                 | 8.452e-08 | FRAS1        | INTRONIC                                |
| rs6732426  | 2   | 43441008  | t             | c                 | 9.954e-08 | THADA        | INTRONIC                                |
| rs11204897 | 1   | 151809066 | a             | g                 | 1.092e-07 | AL589765.4   | UPSTREAM                                |
| rs3901678  | 2   | 43440955  | t             | g                 | 3.971e-07 | THADA        | INTRONIC                                |
| rs13103319 | 4   | 79469734  | a             | t                 | 1.155e-06 | FRAS1        | INTRONIC                                |
| rs7349332  | 2   | 219464627 | t             | c                 | 1.363e-06 | WNT10A       | INTRONIC                                |
| rs7586898  | 2   | 15879050  | c             | g                 | 2.152e-06 | AC113608.1   | INTERGENIC                              |
| rs12623288 | 2   | 46488149  | a             | g                 | 2.837e-06 | AC016912.4   | INTERGENIC                              |
| rs1027444  | 4   | 79612898  | a             | g                 | 3.128e-06 | FRAS1        | INTRONIC                                |
| rs2008485  | 4   | 79495612  | a             | g                 | 3.144e-06 | FRAS1        | INTRONIC                                |
| rs949507   | 4   | 79613110  | a             | g                 | 3.173e-06 | FRAS1        | INTRONIC                                |
| rs454598   | 4   | 79480769  | a             | c                 | 3.201e-06 | FRAS1        | INTRONIC                                |
| rs393285   | 4   | 79499216  | t             | g                 | 3.383e-06 | FRAS1        | INTRONIC                                |
| rs261360   | 20  | 4985774   | a             | g                 | 3.439e-06 | AL121890.2   | INTERGENIC                              |
| rs2627654  | 4   | 79597833  | a             | g                 | 3.44e-06  | FRAS1        | INTRONIC                                |
| rs1484342  | 4   | 79598449  | t             | c                 | 3.505e-06 | FRAS1        | INTRONIC                                |
| rs2645149  | 4   | 79597562  | a             | g                 | 3.519e-06 | FRAS1        | INTRONIC                                |
| rs2627651  | 4   | 79601917  | a             | g                 | 3.562e-06 | FRAS1        | INTRONIC                                |
| rs6840361  | 4   | 163957571 | c             | g                 | 3.676e-06 | NAF1         | INTERGENIC                              |
| rs2627656  | 4   | 79596913  | t             | c                 | 3.697e-06 | FRAS1        | INTRONIC                                |
| rs10027421 | 4   | 163951240 | a             | t                 | 3.775e-06 | NAF1         | INTERGENIC                              |

(Table S3 continued)

|            |    |           |   |   |           |            |                                               |
|------------|----|-----------|---|---|-----------|------------|-----------------------------------------------|
| rs1496581  | 4  | 79596215  | a | c | 3.813e-06 | FRAS1      | INTRONIC                                      |
| rs908922   | 1  | 150721215 | a | g | 3.845e-06 | LCE5A      | INTERGENIC                                    |
| rs1496582  | 4  | 79596208  | t | c | 3.881e-06 | FRAS1      | INTRONIC                                      |
| rs7577700  | 2  | 46464109  | t | g | 3.926e-06 | EPAS1      | INTRONIC                                      |
| rs1496583  | 4  | 79596020  | t | c | 3.975e-06 | FRAS1      | INTRONIC                                      |
| rs3124314  | 1  | 150304139 | t | c | 4.01e-06  | AL591893.2 | INTERGENIC                                    |
| rs2627650  | 4  | 79595931  | t | c | 4.084e-06 | FRAS1      | INTRONIC                                      |
| rs2627653  | 4  | 79605300  | a | g | 4.144e-06 | FRAS1      | INTRONIC                                      |
| rs345542   | 4  | 79507262  | a | c | 4.224e-06 | FRAS1      | INTRONIC                                      |
| rs1496584  | 4  | 79594614  | a | g | 4.235e-06 | FRAS1      | INTRONIC                                      |
| rs7674053  | 4  | 79636887  | a | g | 4.366e-06 | FRAS1      | INTRONIC                                      |
| rs1484331  | 4  | 79574213  | a | g | 4.374e-06 | FRAS1      | INTRONIC                                      |
| rs2645145  | 4  | 79594424  | a | g | 4.376e-06 | FRAS1      | INTRONIC                                      |
| rs2645144  | 4  | 79594396  | a | g | 4.456e-06 | FRAS1      | INTRONIC                                      |
| rs2645143  | 4  | 79594061  | a | g | 4.656e-06 | FRAS1      | INTRONIC                                      |
| rs6816851  | 4  | 79576806  | a | g | 4.876e-06 | FRAS1      | INTRONIC                                      |
| rs2903470  | 4  | 79578033  | c | g | 4.914e-06 | FRAS1      | INTRONIC                                      |
| rs7699000  | 4  | 79582560  | c | g | 5.097e-06 | FRAS1      | INTRONIC<br>SPlice_SITE;<br>SYNONYMOUS CODING |
| rs753752   | 4  | 79591954  | t | c | 5.098e-06 | FRAS1      | INTRONIC                                      |
| rs11730871 | 4  | 79587840  | t | c | 5.143e-06 | FRAS1      | INTRONIC                                      |
| rs4975067  | 4  | 79588791  | a | c | 5.149e-06 | FRAS1      | INTRONIC                                      |
| rs2867068  | 4  | 79584546  | a | g | 5.158e-06 | FRAS1      | INTRONIC                                      |
| rs959539   | 4  | 79591717  | t | g | 5.168e-06 | FRAS1      | INTRONIC                                      |
| rs2867070  | 4  | 79587698  | t | g | 5.17e-06  | FRAS1      | INTRONIC                                      |
| rs10026662 | 4  | 79591880  | a | c | 5.194e-06 | FRAS1      | INTRONIC                                      |
| rs17035085 | 2  | 46458791  | a | g | 5.959e-06 | EPAS1      | INTRONIC                                      |
| rs17035106 | 2  | 46486982  | a | g | 6.383e-06 | AC016912.4 | INTERGENIC                                    |
| rs2380694  | 2  | 15876254  | t | c | 6.417e-06 | AC113608.1 | INTERGENIC                                    |
| rs8017455  | 14 | 80645207  | t | c | 6.479e-06 | TSHR       | INTRONIC                                      |
| rs1496036  | 1  | 150406640 | a | g | 6.667e-06 | AL135842.2 | INTERGENIC                                    |
| rs7143914  | 14 | 80638353  | a | g | 7.284e-06 | TSHR       | INTRONIC                                      |
| rs1454292  | 8  | 4913873   | t | c | 7.733e-06 | AC019176.2 | INTERGENIC                                    |
| rs6669608  | 1  | 150741857 | a | g | 8.224e-06 | LCE5A      | INTERGENIC<br>WITHIN NON CODING<br>GENE       |
| rs4674347  | 2  | 219467323 | c | g | 8.481e-06 | WNT10A     | INTRONIC<br>WITHIN NON CODING<br>GENE         |
| rs13429458 | 2  | 43492342  | a | c | 8.506e-06 | THADA      | INTRONIC<br>WITHIN NON CODING<br>GENE         |
| rs17605562 | 2  | 11954630  | t | c | 8.782e-06 | AC096559.2 | INTRONIC                                      |
| rs10033307 | 4  | 79523250  | t | g | 9.084e-06 | FRAS1      | INTRONIC                                      |
| rs2035511  | 4  | 79571484  | a | g | 9.091e-06 | FRAS1      | INTRONIC                                      |
| rs17316633 | 4  | 111045083 | a | g | 9.421e-06 | EGF        | INTERGENIC                                    |
| rs2100484  | 4  | 79503300  | t | c | 9.423e-06 | FRAS1      | INTRONIC                                      |
| rs6833805  | 4  | 79503452  | t | g | 9.434e-06 | FRAS1      | INTRONIC                                      |
| rs2054722  | 4  | 79569139  | t | c | 9.437e-06 | FRAS1      | INTRONIC                                      |

(Table S3 continued)

|            |   |           |   |   |           |       |                          |
|------------|---|-----------|---|---|-----------|-------|--------------------------|
| rs6835769  | 4 | 79503718  | t | c | 9.442e-06 | FRAS1 | NON SYNONYMOUS<br>CODING |
| rs17035091 | 2 | 46463913  | c | g | 9.527e-06 | EPAS1 | INTRONIC                 |
| rs2298989  | 4 | 111111122 | t | c | 9.697e-06 | EGF   | INTRONIC                 |

Table S4: SNPs located within the 170 candidate genes published by Fujimoto et al <sup>4</sup> with a combined p value of less than .001 for the meta-analysis. (a 20kb border was included in the start and end locations of each gene). Note the EDAR (rs3827760) and FGFR2 (rs4752566) SNPs associated with hair morphology in Asian populations were not significant in the current sample.

| GENE    | SNP        | CHR | BP        | Effect Allele | Non Effect Allele | P        |
|---------|------------|-----|-----------|---------------|-------------------|----------|
| COL22A1 | rs10101430 | 8   | 139893239 | a             | g                 | 0.009057 |
| COL22A1 | rs7838450  | 8   | 139892385 | t             | c                 | 0.005354 |
| COL22A1 | rs10107709 | 8   | 139890134 | t             | g                 | 0.005319 |
| COL22A1 | rs7016754  | 8   | 139881491 | t             | c                 | 0.002641 |
| COL22A1 | rs7836628  | 8   | 139866982 | t             | c                 | 0.00155  |
| COL22A1 | rs6998177  | 8   | 139881401 | a             | g                 | 0.003105 |
| COL22A1 | rs4281141  | 8   | 139876143 | c             | g                 | 0.00158  |
| COL22A1 | rs11779129 | 8   | 139888085 | a             | c                 | 0.004281 |
| COL22A1 | rs10086199 | 8   | 139889816 | a             | g                 | 0.005274 |
| COL22A1 | rs7837787  | 8   | 139875897 | a             | g                 | 0.002479 |
| COL22A1 | rs12547982 | 8   | 139885233 | t             | g                 | 0.00172  |
| COL22A1 | rs4736259  | 8   | 139953356 | c             | g                 | 0.004809 |
| COL22A1 | rs6577948  | 8   | 139867381 | a             | g                 | 0.001535 |
| COL22A1 | rs11992887 | 8   | 139878293 | t             | g                 | 0.00463  |
| COL22A1 | rs11786131 | 8   | 139890504 | a             | t                 | 0.004576 |
| COL22A1 | rs16893541 | 8   | 139890024 | c             | g                 | 0.004519 |
| COL22A1 | rs7838300  | 8   | 139892274 | t             | c                 | 0.005376 |
| COL22A1 | rs6988229  | 8   | 139953691 | t             | c                 | 0.003274 |
| COL22A1 | rs4991003  | 8   | 139888849 | a             | c                 | 0.00446  |
| COL22A1 | rs1879051  | 8   | 139891665 | a             | g                 | 0.005411 |
| COL22A1 | rs11166845 | 8   | 139880292 | t             | c                 | 0.001664 |
| COL22A1 | rs10090299 | 8   | 139890241 | t             | c                 | 0.005328 |
| COL22A1 | rs12544238 | 8   | 139872634 | a             | t                 | 0.002459 |
| EDAR    | rs6542787  | 2   | 108922797 | a             | g                 | 0.008503 |
| EDAR    | rs11690981 | 2   | 108982543 | a             | g                 | 0.003037 |
| EDAR    | rs13427222 | 2   | 108919310 | t             | c                 | 0.006958 |
| EDAR    | rs7598206  | 2   | 108922850 | a             | g                 | 0.008206 |
| EDAR    | rs10865026 | 2   | 108911488 | a             | g                 | 0.006856 |
| EDAR    | rs5021634  | 2   | 108948789 | a             | g                 | 0.002522 |
| EDAR    | rs899259   | 2   | 108913480 | t             | c                 | 0.006877 |
| EDAR    | rs6542785  | 2   | 108922506 | a             | g                 | 0.003112 |
| EDAR    | rs6761501  | 2   | 108916524 | t             | c                 | 0.006936 |
| EDAR    | rs6542786  | 2   | 108922517 | c             | g                 | 0.003127 |
| EGFR    | rs1107617  | 7   | 55247762  | a             | c                 | 0.009309 |
| FGF5    | rs12054583 | 4   | 81400412  | a             | g                 | 0.000144 |
| FGF5    | rs7681907  | 4   | 81424892  | a             | g                 | 0.003374 |
| FGF5    | rs6826137  | 4   | 81437528  | t             | c                 | 0.006462 |
| FGF5    | rs6827834  | 4   | 81419669  | t             | c                 | 0.002653 |
| FGF5    | rs16998073 | 4   | 81403365  | a             | t                 | 0.003415 |
| FGF5    | rs4690116  | 4   | 81425401  | a             | t                 | 0.002614 |

(Table S4 continued)

| GENE    | SNP        | CHR | BP        | Effect Allele | Non Effect Allele | P        |
|---------|------------|-----|-----------|---------------|-------------------|----------|
| FGF5    | rs11099098 | 4   | 81388936  | t             | g                 | 0.003884 |
| FGF5    | rs982804   | 4   | 81426063  | t             | c                 | 0.002612 |
| FGF5    | rs1458046  | 4   | 81418990  | a             | g                 | 0.002656 |
| FGF5    | rs3796606  | 4   | 81413114  | a             | g                 | 0.002722 |
| FGF5    | rs1379707  | 4   | 81399403  | t             | c                 | 0.000146 |
| GPC5    | rs9589238  | 13  | 90899354  | a             | c                 | 0.005625 |
| GPC5    | rs9583922  | 13  | 90870599  | a             | t                 | 0.004983 |
| GPC5    | rs9583924  | 13  | 90872601  | c             | g                 | 0.004969 |
| GPC5    | rs1333674  | 13  | 92002609  | a             | g                 | 0.002326 |
| GPC5    | rs9301729  | 13  | 90893934  | t             | g                 | 0.005012 |
| GPC5    | rs9989098  | 13  | 90891718  | a             | c                 | 0.005391 |
| GPC5    | rs7324710  | 13  | 90883326  | a             | g                 | 0.004839 |
| GPC5    | rs9589237  | 13  | 90899291  | t             | g                 | 0.005539 |
| GPC5    | rs9583927  | 13  | 90881551  | t             | c                 | 0.00497  |
| GPC5    | rs13378852 | 13  | 90882639  | t             | c                 | 0.005013 |
| GPC5    | rs9589230  | 13  | 90883171  | c             | g                 | 0.005014 |
| KRTAP10 | rs9978932  | 21  | 44948974  | a             | g                 | 0.001831 |
| KRTAP10 | rs9981523  | 21  | 44941147  | t             | c                 | 0.002583 |
| KRTAP12 | rs9981523  | 21  | 44941147  | t             | c                 | 0.002583 |
| LHCGR   | rs11125179 | 2   | 48769375  | a             | g                 | 0.000462 |
| LHCGR   | rs1949778  | 2   | 48778325  | a             | t                 | 0.001862 |
| LHCGR   | rs1464729  | 2   | 48759460  | t             | c                 | 0.002966 |
| LHCGR   | rs3792246  | 2   | 48752654  | a             | g                 | 0.002492 |
| LHCGR   | rs1554614  | 2   | 48776569  | t             | c                 | 0.001557 |
| LHCGR   | rs2293275  | 2   | 48774879  | t             | c                 | 0.004115 |
| LHCGR   | rs1524151  | 2   | 48759553  | a             | c                 | 0.002341 |
| LHCGR   | rs6713319  | 2   | 48757771  | a             | g                 | 0.001398 |
| LHCGR   | rs1404056  | 2   | 48777817  | t             | g                 | 0.004387 |
| LHCGR   | rs17326209 | 2   | 48761142  | a             | g                 | 0.001753 |
| LHCGR   | rs2349101  | 2   | 48776207  | a             | g                 | 0.00202  |
| LHCGR   | rs17326251 | 2   | 48770326  | a             | g                 | 0.000474 |
| MREG    | rs13030243 | 2   | 216515472 | t             | c                 | 0.002348 |
| MREG    | rs6435927  | 2   | 216516397 | a             | c                 | 0.002304 |
| MREG    | rs6744723  | 2   | 216524663 | t             | c                 | 0.007324 |
| MREG    | rs6706891  | 2   | 216525908 | t             | c                 | 0.000479 |
| MREG    | rs1560233  | 2   | 216521215 | a             | g                 | 0.000952 |
| MREG    | rs8911     | 2   | 216515971 | a             | g                 | 0.002325 |
| MREG    | rs12995228 | 2   | 216508617 | t             | g                 | 0.002044 |
| TCHH    | rs2935208  | 1   | 150344483 | c             | g                 | 0.000298 |
| TCHH    | rs2496253  | 1   | 150348545 | c             | g                 | 0.000288 |
| TCHH    | rs1496041  | 1   | 150355229 | t             | c                 | 1.77E-05 |



(Table S4 continued)

| GENE   | SNP        | CHR | BP        | Effect Allele | Non Effect Allele | P        |
|--------|------------|-----|-----------|---------------|-------------------|----------|
| TCHH   | rs11204925 | 1   | 150339744 | a             | g                 | 0.001965 |
| TCHH   | rs1131473  | 1   | 150346447 | c             | g                 | 1.86E-05 |
| TCHH   | rs17646946 | 1   | 150329391 | a             | g                 | 1.50E-31 |
| TCHH   | rs1131471  | 1   | 150346613 | t             | g                 | 0.000288 |
| TCHH   | rs11803731 | 1   | 150349949 | a             | t                 | 3.18E-31 |
| TGFA   | rs2190649  | 2   | 70649984  | t             | c                 | 0.006138 |
| TGFA   | rs2215021  | 2   | 70649765  | a             | g                 | 0.006067 |
| TGFA   | rs1523303  | 2   | 70642406  | t             | c                 | 0.005959 |
| WNT10A | rs4674348  | 2   | 219478222 | a             | t                 | 0.000231 |
| WNT10A | rs4574113  | 2   | 219470906 | a             | g                 | 0.00028  |
| WNT10A | rs7571111  | 2   | 219477200 | t             | c                 | 0.001767 |
| WNT10A | rs7349332  | 2   | 219464627 | t             | c                 | 1.36E-06 |
| WNT10A | rs2385199  | 2   | 219458990 | a             | g                 | 2.28E-05 |
| WNT10A | rs4674347  | 2   | 219467323 | c             | g                 | 8.48E-06 |
| WNT10A | rs6723140  | 2   | 219482944 | t             | c                 | 0.001801 |
| WNT10A | rs6754599  | 2   | 219440386 | c             | g                 | 1.05E-05 |
| WNT10A | rs10193725 | 2   | 219434742 | t             | c                 | 0.00033  |
| WNT10A | rs10177996 | 2   | 219454805 | t             | c                 | 0.002906 |
| WNT10A | rs3806557  | 2   | 219452118 | a             | g                 | 2.46E-05 |
| WNT10A | rs6747776  | 2   | 219433562 | c             | g                 | 0.001689 |
| WNT10A | rs6723251  | 2   | 219483053 | t             | c                 | 5.07E-05 |

## Supplemental References

1. McEvoy, B.P., Montgomery, G.W., McRae, A.F., Ripatti, S., Perola, M., Spector, T.D., Cherkas, L., Ahmadi, K.R., Boomsma, D., Willemsen, G., et al. (2009). Geographical structure and differential natural selection among North European populations. *Genome Res* 19, 804-814.
2. Price, A.L., Patterson, N.J., Plenge, R.M., Weinblatt, M.E., Shadick, N.A., and Reich, D. (2006). Principal components analysis corrects for stratification in genome-wide association studies. *Nat Genet* 38, 904-909.
3. Colella, S., Yau, C., Taylor, J., Mirza, G., Butler, H., Clouston, P., Bassett, A., Seller, A., Holmes, C., and Ragoussis, J. (2007). QuantiSNP: an Objective Bayes Hidden-Markov Model to detect and accurately map copy number variation using SNP genotyping data. *Nucleic Acids Res* 35, 2013-2025.
4. Fujimoto, A., Kimura, R., Ohashi, J., Omi, K., Yuliwulandari, R., Batubara, L., Mustofa, M.S., Samakkarn, U., Settheetham-Ishida, W., Ishida, T., et al. (2008). A scan for genetic determinants of human hair morphology: EDAR is associated with Asian hair thickness. *Hum Mol Genet* 17, 835-843.
5. Li, J.Z., Absher, D.M., Tang, H., Southwick, A.M., Casto, A.M., Ramachandran, S., Cann, H.M., Barsh, G.S., Feldman, M., Cavalli-Sforza, L.L., et al. (2008). Worldwide human relationships inferred from genome-wide patterns of variation. *Science* 319, 1100-1104.
